# Supplementary material
Source: HighWire-hosted journal article supplement (https://bjsm.bmj.com/content/bjsports-2022-105754)
Supplement: inline-supplementary-material-3 [file inline-supplementary-material-3.pdf]

**SF3: Outcome domains and example outcomes included in review.**

| Domain                             | ICON Definition                                                                                                                                      | Example Tools                                                                                                                                                                                                                                                                                                                                                                                                                                                                                                                                                                                                                                                                                                                                                                                                                                                                                                                                                                                                                                                                                                                              |
|------------------------------------|------------------------------------------------------------------------------------------------------------------------------------------------------|--------------------------------------------------------------------------------------------------------------------------------------------------------------------------------------------------------------------------------------------------------------------------------------------------------------------------------------------------------------------------------------------------------------------------------------------------------------------------------------------------------------------------------------------------------------------------------------------------------------------------------------------------------------------------------------------------------------------------------------------------------------------------------------------------------------------------------------------------------------------------------------------------------------------------------------------------------------------------------------------------------------------------------------------------------------------------------------------------------------------------------------------|
| Disability                         | Composite scores of a mix of patient-rated pain & disability due to the pain, usually relating to tendon-specific activities/tasks                   | VISA scales; DASH; quick DASH; SPADI; Patient-rated tennis-elbow evaluation questionnaire; Constant Murley Score; WORC (Western Ontario Rotator Cuff Index); AOFAS (American Orthopaedic Foot & Ankle Society); Roles and Maudsley score; ASES (American Shoulder & Elbow Surgeons Index); Hip & Groin Outcome Score; Foot & Ankle outcome score (FAOS)/Questionnaire (FAOQ); Oxford hip score (OHS); Hip disability & outcome OA score (HOOS); Tegner activity score; Lysholm knee scale; Pain free function questionnaire; Ankle activity score; Subjective elbow Value (SEV); Placzek score; Shoulder disability questionnaire; Foot function index (FFI); International Knee Documentation Committee form (IKDC); Penn Shoulder score (university of Pennsylvania shoulder score) (PSS); Brief pain inventory (BPI); UCLA Shoulder Rating Scale; FILLA - functional index of leg and lower limb; Neer Shoulder Score; Nirschl phase rating scale; Manchester–Oxford Foot Questionnaire (MOXFQ); American Shoulder and Elbow Surgeon's (MASES) questionnaire; Mayo Elbow Performance Score (MEPS); Shoulder rating questionnaire (SRQ); |
| Function                           | Participant/patient rated level of function (and not referring to the intensity of their pain; eg, Patient Specific Function Scale on a VAS or NRS). | Patient-specific functional scale                                                                                                                                                                                                                                                                                                                                                                                                                                                                                                                                                                                                                                                                                                                                                                                                                                                                                                                                                                                                                                                                                                          |
| Pain on loading/activity           | Patient reported intensity of pain performing a task that loads the tendon                                                                           | VAS; NRS; Pain experience scale                                                                                                                                                                                                                                                                                                                                                                                                                                                                                                                                                                                                                                                                                                                                                                                                                                                                                                                                                                                                                                                                                                            |
| Pain over a specified time         | Patient-reported pain intensity over period of time e.g. morning/night/24-hours/1-week                                                               | VAS; NRS Painful days in 3 months                                                                                                                                                                                                                                                                                                                                                                                                                                                                                                                                                                                                                                                                                                                                                                                                                                                                                                                                                                                                                                                                                                          |
| Pain without further specification | Patient asked about pain levels without reference to activity or timeframe                                                                           | VAS; NRS; Borg CR10 Scale; Pain status                                                                                                                                                                                                                                                                                                                                                                                                                                                                                                                                                                                                                                                                                                                                                                                                                                                                                                                                                                                                                                                                                                     |
| Physical function capacity         | Quantitative measures of physical tasks (e.g. hops, times walk, single leg squat) includes muscle strength                                           | Counter movement jump; one-leg triple hop; single-leg decline squat; muscle strength measured by dynamometry (hand-held, isokinetic); manual muscle testing.                                                                                                                                                                                                                                                                                                                                                                                                                                                                                                                                                                                                                                                                                                                                                                                                                                                                                                                                                                               |
| Quality of Life                    | General wellbeing                                                                                                                                    | EQ5D; EQ3D; SF-36 or SF-12; Assessment of Quality of Life (AQoL); Nottingham Health Profile; Gothenburg QoL Instrument                                                                                                                                                                                                                                                                                                                                                                                                                                                                                                                                                                                                                                                                                                                                                                                                                                                                                                                                                                                                                     |
| Range of Motion (shoulder only)    | Active or passive range of motion in specified plane, measured in degrees.                                                                           | Hand-held goniometer; inclinometer                                                                                                                                                                                                                                                                                                                                                                                                                                                                                                                                                                                                                                                                                                                                                                                                                                                                                                                                                                                                                                                                                                         |

VISA= Victorian Institute of Sport Assessment; DASH =Disabilities of the Arm, Shoulder and Hand;  
 OA= osteoarthritis; VAS= visual analogue scale; NRS= Numerical Rating Scale.
